# Supplementary material
Source: PubMed Central journal article supplement (PMC4600324)
Supplement: NIHMS723392-supplement-Supp__Tables.pdf [file NIHMS723392-supplement-Supp__Tables.pdf]

| Protein names                                                         | Gene names    | Sequence coverage [%] |
|-----------------------------------------------------------------------|---------------|-----------------------|
| Max-like protein X                                                    | Mlx           | 23.5                  |
| WD repeat-containing protein 76                                       | Wdr76         | 24.8                  |
| Epithelial splicing regulatory protein 2                              | Esrp2         | 15.5                  |
| RNA-binding protein with multiple splicing                            | Rbpms         | 35.9                  |
| Aryl hydrocarbon receptor nuclear translocator-like protein 1 (Bmal1) | Arntl (Bmal1) | 24.3                  |
| Transcription factor EB                                               | Tfeb          | 3                     |
| RNA binding protein fox-1 homolog 2                                   | Rbfox2        | 14.9                  |
| Circadian locomotor output cycles protein kaput                       | Clock         | 18.7                  |
| Membrane-associated progesterone receptor component 1                 | Pgrmc1        | 16.4                  |
| Nuclease-sensitive element-binding protein 1                          | Ybx1          | 29.5                  |
| RNA-binding protein 45                                                | Rbm45         | 50.4                  |
| Serine/threonine-protein phosphatase PGAM5, mitochondrial             | Pgam5         | 26.4                  |
| RNA-binding protein with multiple splicing 2                          | Rbpms2        | 52.4                  |
| Carbohydrate-responsive element-binding protein                       | Mlxipl        | 7.4                   |
| 2,4-dienoyl-CoA reductase, mitochondrial                              | Decr1         | 33.7                  |

**Supplementary Table 1** List of statistically significant E-box-associated proteins (FDR < 0.05) identified in LC-MS/MS pilot study from E-box oligonucleotide affinity purification from mouse livers harvested at CT6 (see **Supplementary Figure 1**). Proteins are ordered by significance, with highest significance at top. Blue highlight indicates the subset of proteins that were also significantly (FDR < 0.05) dependent on the presence of Bmal1. Identification of Bmal1 and Clock validated the approach; identification of Wdr76 provided a link to the Ddb1–Cul4 E3 ubiquitin ligase.

| Chromosome | Genome coordinates |           | Gene name/symbol |
|------------|--------------------|-----------|------------------|
| chr2       | 163366401          | 163366691 | 0610008F07Rik    |
| chr5       | 113581991          | 113582471 | 2900026A02Rik    |
| chr4       | 128623971          | 128624330 | Adc              |
| chr5       | 90989841           | 90990240  | Afm              |
| chr4       | 141297801          | 141298260 | Agmat            |
| chr6       | 42319951           | 42320331  | AK008560         |
| chr2       | 167829081          | 167829361 | AK027991         |
| chr5       | 149806711          | 149807071 | AK036974         |
| chr5       | 149790031          | 149790480 | AK036974         |
| chr1       | 88929011           | 88929330  | AK077157         |
| chr14      | 70026971           | 70027270  | AK086749         |
| chr13      | 44401561           | 44402001  | AK136877         |
| chr11      | 31724481           | 31724991  | AK158188         |
| chr11      | 31738391           | 31738780  | AK158188         |
| chr15      | 64176561           | 64176961  | Asap1            |
| chr12      | 113334401          | 113334771 | Aspg             |
| chr3       | 101609301          | 101609661 | BC037703         |
| chr19      | 3833151            | 3833380   | Chka             |
| chr2       | 92263781           | 92264241  | Cry2             |
| chr2       | 92261861           | 92262141  | Cry2             |
| chr19      | 46742651           | 46743210  | Cyp17a1          |
| chr18      | 68221771           | 68222150  | D18Erttd653e     |
| chr7       | 52960041           | 52960800  | Dbp              |
| chr7       | 52962911           | 52963280  | Dbp              |
| chr7       | 52961331           | 52961720  | Dbp              |
| chr5       | 73865701           | 73865971  | Dcun1d4          |
| chr1       | 135258831          | 135259130 | Etnk2            |
| chr1       | 135272491          | 135272940 | Etnk2            |
| chr1       | 135268711          | 135269130 | Etnk2            |
| chr5       | 93014891           | 93015381  | Fam47e           |
| chr8       | 126789671          | 126790230 | Galnt2           |
| chr11      | 20353801           | 20354161  | Gm12034          |
| chr3       | 95685851           | 95686541  | Gm129            |
| chr3       | 95686011           | 95686550  | Gm129            |
| chr7       | 6362751            | 6363090   | Gm16532          |
| chr19      | 26839821           | 26840171  | Gm815            |
| chr9       | 107577321          | 107577601 | Gnat1            |
| chr9       | 107576751          | 107577191 | Gnat1            |
| chr8       | 96911371           | 96911610  | Herpud1          |
| chr19      | 42119751           | 42120131  | Hoga1            |
| chr12      | 25917451           | 25917950  | Id2              |

|       |           |           |          |
|-------|-----------|-----------|----------|
| chr6  | 55125921  | 55126440  | Inmt     |
| chr8  | 129137901 | 129138400 | Irf2bp2  |
| chr6  | 146219651 | 146220170 | Itpr2    |
| chr6  | 94949001  | 94949351  | Kbtbd8   |
| chr19 | 23564161  | 23564581  | Mamdc2   |
| chr5  | 138227911 | 138228240 | Mepce    |
| chr16 | 4896661   | 4897130   | Mgrn1    |
| chr1  | 186648361 | 186648761 | Mir1981  |
| chr6  | 49992021  | 49992600  | Mpp6     |
| chr15 | 25621931  | 25622380  | Myo10    |
| chr7  | 56607151  | 56607670  | Nav2     |
| chr15 | 58830621  | 58831061  | Ndufb9   |
| chr13 | 53070031  | 53070590  | Nfil3    |
| chr11 | 98634931  | 98635311  | Nr1d1    |
| chr11 | 98636441  | 98637151  | Nr1d1    |
| chr11 | 98644521  | 98645140  | Nr1d1    |
| chr11 | 98635321  | 98635630  | Nr1d1    |
| chr15 | 84753211  | 84753690  | Nup50    |
| chr16 | 87610431  | 87610820  | ORF63    |
| chr11 | 68908511  | 68908970  | Per1     |
| chr11 | 68908231  | 68908501  | Per1     |
| chr11 | 68912171  | 68912391  | Per1     |
| chr1  | 93355841  | 93356161  | Per2     |
| chr3  | 41368401  | 41368720  | Phf17    |
| chr5  | 136150701 | 136151140 | Por      |
| chr15 | 85601691  | 85602121  | Ppara    |
| chr18 | 61533561  | 61533990  | Ppargc1b |
| chr18 | 61517251  | 61517750  | Ppargc1b |
| chr3  | 78887011  | 78887271  | Rapgef2  |
| chr1  | 155544761 | 155545150 | Rgs16    |
| chr14 | 69880961  | 69881281  | Slc25a37 |
| chr17 | 5893111   | 5893540   | Synj2    |
| chr8  | 122128861 | 122129300 | Taf1c    |
| chr7  | 104572261 | 104572641 | Thrsp    |
| chr3  | 146252381 | 146252980 | Uox      |
| chr2  | 58607051  | 58607690  | Upp2     |
| chr11 | 118126941 | 118127480 | Usp36    |

**Supplementary Table 2** List of 78 validated Clock–Bmal1 binding sites from mouse liver, as described in text (also see **Online Methods, Figure 3**). Sites are ordered alphabetically by gene name/symbol.

| Chromosome | Genome coordinates |           | Gene name/symbol |
|------------|--------------------|-----------|------------------|
| chr2       | 4498551            | 4498820   | 2010003K11Rik    |
| chr13      | 106450941          | 106451460 | Acot11           |
| chr4       | 116060461          | 116060740 | Acox1            |
| chr11      | 9091751            | 9092220   | Acox2            |
| chr19      | 66701541           | 66701861  | Adam2            |
| chr11      | 95029411           | 95029660  | Agxt             |
| chr1       | 54129511           | 54129860  | AK020588         |
| chr14      | 10347731           | 10348210  | AK028773         |
| chr19      | 126826491          | 126826710 | AK029402         |
| chr17      | 39756491           | 39756740  | AK029768         |
| chr4       | 129058251          | 129058560 | AK042900         |
| chr7       | 129153851          | 129154040 | AK139522         |
| chr1       | 144550451          | 144550770 | AK147071         |
| chr12      | 86479021           | 86479201  | AK157878         |
| chr14      | 92934761           | 92935040  | AK158157         |
| chr2       | 128660971          | 128661250 | Ak2              |
| chr4       | 81468781           | 81469180  | AK200600         |
| chr15      | 90494441           | 90495000  | Aldh1l1          |
| chr16      | 122041691          | 122042030 | Aldh2            |
| chr12      | 46064871           | 46065280  | Apoa5            |
| chr1       | 27416321           | 27416540  | BC050122         |
| chr6       | 27452551           | 27452920  | BC050122         |
| chr14      | 52823551           | 52823970  | Bcat2            |
| chr4       | 151235921          | 151236251 | Camta1           |
| chr3       | 142363831          | 142364230 | Ccbl2            |
| chr17      | 66766321           | 66766790  | Chrna2           |
| chr6       | 129125641          | 129125990 | Clec2d           |
| chr9       | 55109311           | 55109520  | Coq10b           |
| chr4       | 3326341            | 3326880   | Cpt1a            |
| chr15      | 111470131          | 111470340 | Dio3os           |
| chr8       | 182935521          | 182935930 | Ephx1            |
| chr1       | 25359121           | 25359480  | Ethe1            |
| chr2       | 135268641          | 135268961 | Etnk2            |
| chr15      | 91753151           | 91753530  | Fah              |
| chr7       | 140918991          | 140919320 | Fam131c          |
| chr13      | 124087101          | 124087450 | Fbxo31           |
| chr5       | 77878721           | 77879220  | Gcm1             |
| chr1       | 128118041          | 128118540 | Glt1d1           |
| chr3       | 160075421          | 160075910 | Gm826            |
| chr5       | 141271171          | 141271431 | Gna12            |
| chr11      | 115885891          | 115886170 | H3f3b            |
| chr11      | 123631481          | 123631951 | Hpd              |
| chr16      | 36131931           | 36132200  | Hs6st1           |

|       |           |           |              |
|-------|-----------|-----------|--------------|
| chr6  | 126792431 | 126792750 | Inhbe        |
| chr15 | 69195901  | 69196250  | Khdrbs3      |
| chr11 | 85792071  | 85792460  | Lin52        |
| chr1  | 97219501  | 97219891  | Lmod3        |
| chr7  | 49508221  | 49508580  | LOC100415784 |
| chr2  | 85272881  | 85273280  | Lrpprc       |
| chr12 | 169317491 | 169317720 | Mgst3        |
| chr4  | 72219981  | 72220290  | Mreg         |
| chr1  | 52532041  | 52532360  | Ndrg2        |
| chr13 | 35545911  | 35546270  | Pank3        |
| chr4  | 32694301  | 32694581  | Papss2       |
| chr14 | 120478351 | 120478710 | Pcyt2        |
| chr17 | 86316881  | 86317220  | Plin2        |
| chr5  | 107739301 | 107739481 | Podn         |
| chr3  | 88498261  | 88498710  | Pomt2        |
| chr2  | 85602261  | 85602690  | Ppara        |
| chr9  | 5136671   | 5136970   | Ppl          |
| chr1  | 57494901  | 57495270  | Ppm1k        |
| chr12 | 163198271 | 163198540 | Prdx6        |
| chr7  | 99424941  | 99425180  | Prkg2        |
| chr8  | 18083521  | 18083731  | Prodh        |
| chr14 | 90405411  | 90405920  | Ptprj        |
| chr6  | 120937101 | 120937460 | Rassf3       |
| chr3  | 155526311 | 155526620 | Rgs8         |
| chr19 | 27103831  | 27104150  | Sardh        |
| chr1  | 107798991 | 107799400 | Scp2         |
| chr9  | 134419931 | 134420320 | Sephs2       |
| chr5  | 149172871 | 149173131 | Slc25a33     |
| chr1  | 69881051  | 69881350  | Slc25a37     |
| chr5  | 98357361  | 98357701  | Slc38a7      |
| chr5  | 84691321  | 84691750  | Slc43a1      |
| chr11 | 54356861  | 54357141  | Stim2        |
| chr4  | 59898701  | 59899010  | Sucnr1       |
| chr16 | 79562081  | 79562300  | Sun2         |
| chr6  | 61226881  | 61227350  | Tle3         |
| chr5  | 79220921  | 79221320  | Tmem184b     |
| chr10 | 8410371   | 8410620   | Tns3         |
| chr5  | 125873651 | 125873880 | Ubc          |
| chr8  | 90282511  | 90282861  | Uroc1        |

**Supplementary Table 3** List of 85 Cbp (P300) binding sites from mouse liver<sup>28</sup> that do not overlap with Clock–Bmal1 sites, as described in text (also see **Online Methods, Figure 3**). Sites are ordered alphabetically by gene name/symbol.
